# Supplementary material for: The Effectiveness of Clinician-Led Community-Based Group Exercise Interventions on Health Outcomes in Adults with Type 2 Diabetes Mellitus: A Systematic Review and Meta-Analysis
Source: MDPI journal article supplement (doi:10.3390/ijerph21050601), 2024-05-07
Supplement: s1 [file s1]

## SUPPLEMENTARY FILE – MeSH Terms and Database Searches

**Table S1.** MeSH Terms and Database Searches

| Database                    | MeSH Terms and Search Strategy                                                                                                                                                                                                                                                                                                                                                                                                                                                                                                                                                                                                                                                                                                                                                                                                                                                                                                                                                                                                                                                                                                                                                                                                                                                                                                                                                                                                                                                                                                                                                                                                                                  |
|-----------------------------|-----------------------------------------------------------------------------------------------------------------------------------------------------------------------------------------------------------------------------------------------------------------------------------------------------------------------------------------------------------------------------------------------------------------------------------------------------------------------------------------------------------------------------------------------------------------------------------------------------------------------------------------------------------------------------------------------------------------------------------------------------------------------------------------------------------------------------------------------------------------------------------------------------------------------------------------------------------------------------------------------------------------------------------------------------------------------------------------------------------------------------------------------------------------------------------------------------------------------------------------------------------------------------------------------------------------------------------------------------------------------------------------------------------------------------------------------------------------------------------------------------------------------------------------------------------------------------------------------------------------------------------------------------------------|
| <b>Medline<br/>via Ovid</b> | <ol style="list-style-type: none"> <li>1. exp Diabetes Mellitus, Type 2/</li> <li>2. (Type* adj3 ("2" or "II" or two*) adj3 (diabete* or diabetic*)).ti,ab.</li> <li>3. ((Maturit* or adult* or slow*) adj3 onset* adj3 (diabete* or diabetic*)).ti,ab.</li> <li>4. ((Ketosis-resistant* or stable*) adj3 (diabete* or diabetic*)).ti,ab.</li> <li>5. (((Non-insulin* or Non insulin* or Noninsulin*) adj3 depend* adj3 (diabete* or diabetic*)) or (NIDDM or T2DM or T2D)).ti,ab.</li> <li>6. or/1-5</li> <li>7. exp Exercise Therapy/</li> <li>8. Exercise/</li> <li>9. Physical Fitness/</li> <li>10. (physical activit* or exercise or fitness or group exercise or strength training).ti,ab.</li> <li>11. (group adj2 (exercise or fitness)).ti,ab.</li> <li>12. (functional adj2 (fitness or training)).ti,ab.</li> <li>13. or/7-12</li> <li>14. exp Health Personnel/</li> <li>15. (clinician* or physiotherap* or physical therap* or exercise physiologist* or personal trainer* or trainer* or health educator* or allied health personnel or lead* or led or supervis*).mp.</li> <li>16. or/14-15</li> <li>17. Community Health Centers/</li> <li>18. (communit* or community based or community centre* or community center* or fitness centre* or fitness center* or gym* or community hall*).mp.</li> <li>19. or/17-18</li> <li>20. and/6,13,16,19</li> <li>21. adult/ or exp aged/ or middle aged/ or young adult/</li> <li>22. (adult* or young adult* or middle-aged or elder* or older adult*).mp.</li> <li>23. or/21-22</li> <li>24. and/20,23</li> <li>25. limit 24 to english language</li> <li>26. limit 25 to yr="2003 -2023"</li> </ol> |
| <b>Embase<br/>via Ovid</b>  | <ol style="list-style-type: none"> <li>1. non insulin dependent diabetes mellitus/</li> <li>2. (Type* adj3 ("2" or "II" or two*) adj3 (diabete* or diabetic*)).ti,ab.</li> <li>3. ((Maturit* or adult* or slow*) adj3 onset* adj3 (diabete* or diabetic*)).ti,ab.</li> <li>4. ((Ketosis-resistant* or stable*) adj3 (diabete* or diabetic*)).ti,ab.</li> <li>5. (((Non-insulin* or Non insulin* or Noninsulin*) adj3 depend* adj3 (diabete* or diabetic*)) or (NIDDM or T2DM or T2D)).ti,ab.</li> <li>6. or/1-5</li> <li>7. exp kinesiotherapy/</li> <li>8. exp Exercise/</li> <li>9. Fitness/</li> <li>10. (physical activit* or exercise or fitness or group exercise or strength training).ti,ab.</li> <li>11. (group adj2 (exercise or fitness)).ti,ab.</li> <li>12. (functional adj2 (fitness or training)).ti,ab.</li> <li>13. or/7-12</li> <li>14. exp Health care Personnel/</li> <li>15. (clinician* or physiotherap* or physical therap* or exercise physiologist* or personal trainer* or trainer* or health educator* or allied health personnel or lead* or led or supervis*).mp.</li> <li>16. or/14-15</li> <li>17. health center/</li> </ol>                                                                                                                                                                                                                                                                                                                                                                                                                                                                                                     |

|                                      |                                                                                                                                                                                                                                                                                                                                                                                                                                                                                                                                                                                                                                                                                                                                                                                                                                                                                                                                                                                                                                                                                                                                                                                                                                                                                                                                                                                                                                                                                                                                                                                                                                                                              |
|--------------------------------------|------------------------------------------------------------------------------------------------------------------------------------------------------------------------------------------------------------------------------------------------------------------------------------------------------------------------------------------------------------------------------------------------------------------------------------------------------------------------------------------------------------------------------------------------------------------------------------------------------------------------------------------------------------------------------------------------------------------------------------------------------------------------------------------------------------------------------------------------------------------------------------------------------------------------------------------------------------------------------------------------------------------------------------------------------------------------------------------------------------------------------------------------------------------------------------------------------------------------------------------------------------------------------------------------------------------------------------------------------------------------------------------------------------------------------------------------------------------------------------------------------------------------------------------------------------------------------------------------------------------------------------------------------------------------------|
|                                      | 18. (communit* or community based or community centre* or community center* or fitness centre* or fitness center* or gym* or community hall*).mp.<br>19. or/17-18<br>20. and/6,13,16,19<br>21. adult/ or exp aged/ or middle aged/ or young adult/<br>22. (adult* or young adult* or middle-aged or elder* or older adult*).mp.<br>23. or/21-22<br>24. and/20,23<br>25. limit 24 to english language<br>26. limit 25 to yr="2003 -2023"<br>27. limit 26 to "remove medline records"<br>28. limit 27 to conference abstract<br>29. 27 not 28                                                                                                                                                                                                                                                                                                                                                                                                                                                                                                                                                                                                                                                                                                                                                                                                                                                                                                                                                                                                                                                                                                                                  |
| <b>Scopus</b>                        | (( TITLE-ABS-KEY ( ( ( type* W/3 ( "2" OR "II" OR two* ) W/3 ( diabete* OR diabetic* ) ) ) ) OR TITLE-ABS-KEY ( ( ( maturit* OR adult* OR slow* ) W/3 onset* W/3 ( diabete* OR diabetic* ) ) ) OR TITLE-ABS-KEY ( ( ( "Ketosis-resistant*" OR stable* ) W/3 ( diabete* OR diabetic* ) ) ) OR TITLE-ABS-KEY ( ( ( "Non-insulin*" OR "Non insulin*" OR noninsulin* ) W/3 depend* W/3 ( diabete* OR diabetic* ) ) OR ( niddm OR t2dm OR t2d ) ) ) AND ( TITLE-ABS-KEY ( adult* OR "young adult*" OR "middle-aged" OR elder* OR "older adult*" ) ) AND ( TITLE-ABS-KEY ( communit* OR "community based" OR "community centre*" OR "community center*" OR "fitness centre*" OR "fitness center*" OR gym* OR "community hall*" ) ) AND ( TITLE-ABS-KEY ( clinician* OR physiotherap* OR "physical therap*" OR "exercise physiologist*" OR "personal trainer*" OR trainer* OR "health educator*" OR "allied health personnel" OR lead* OR led OR supervis* ) ) AND ( ( TITLE-ABS-KEY ( "physical activit*" OR "physical fitness" OR "exercise therap*" OR "physical therap*" OR exercise OR fitness OR "group exercise" OR "strength training" ) ) OR TITLE-ABS-KEY ( ( group ) W/2 ( exercise OR fitness ) ) OR TITLE-ABS-KEY ( ( functional ) W/2 ( fitness OR training ) ) ) ) AND PUBYEAR > 2002 AND PUBYEAR < 2023 ) AND ( LIMIT-TO ( LANGUAGE , "English" ) )                                                                                                                                                                                                                                                                                                                 |
| <b>Cinahl Complete via Ebscohost</b> | S1 (MH "Diabetes Mellitus, Type 2")<br>S2 TI ( (Type* N3 ("2" or "II" or two*) N3 (diabete* or diabetic*)) ) OR AB ( (Type* N3 ("2" or "II" or two*) N3 (diabete* or diabetic*)) )<br>S3 TI ( ((Maturit* or adult* or slow*) N3 onset* N3 (diabete* or diabetic*)) ) OR AB ( ((Maturit* or adult* or slow*) N3 onset* N3 (diabete* or diabetic*)) )<br>S4 TI ( ( ("Ketosis-resistant*" or stable*) N3 (diabete* or diabetic*)) ) OR AB ( ( ("Ketosis-resistant*" or stable*) N3 (diabete* or diabetic*)) )<br>S5 TI ( ( ("Non-insulin*" or "Non insulin*" or Noninsulin*) N3 depend* N3 (diabete* or diabetic*)) or (NIDDM or T2DM or T2D)) ) OR AB ( ( ("Non-insulin*" or "Non insulin*" or Noninsulin*) N3 depend* N3 (diabete* or diabetic*)) or (NIDDM or T2DM or T2D)) )<br>S6 S1 OR S2 OR S3 OR S4 OR S5<br>S7 (MH "Physical Therapy+")<br>S8 (MH "Exercise+")<br>S9 (MH "Physical Fitness+")<br>S10 TI ( ("physical activit*" or exercise or fitness or "group exercise" or "strength training") ) OR AB ( ("physical activit*" or exercise or fitness or "group exercise" or "strength training") )<br>S11 TI ( (group N2 (exercise or fitness)) ) OR AB ( (group N2 (exercise or fitness)) )<br>S12 TI ( (functional N2 (fitness or training)) ) OR AB ( (functional N2 (fitness or training)) )<br>S13 S7 OR S8 OR S9 OR S10 OR S11 OR S12<br>S14 (MH "Health Personnel+")<br>S15 TI( (clinician* or physiotherap* or "physical therap*" or "exercise physiologist*" or "personal trainer*" or trainer* or "health educator*" or "allied health personnel" or lead* or led or supervis*) ) OR AB ( (clinician* or physiotherap* or "physical therap*" or "exercise |

|               |                                                                                                                                                                                                                                                                                                                                                                                                                                                                                                                                                                                                                                                                                                                                                                                                                                                                                                                                                                                                                                                                                                                                                                                                                                                                                                                                                                                                                                                                                                                                                                                                                                                                                                                                                                             |
|---------------|-----------------------------------------------------------------------------------------------------------------------------------------------------------------------------------------------------------------------------------------------------------------------------------------------------------------------------------------------------------------------------------------------------------------------------------------------------------------------------------------------------------------------------------------------------------------------------------------------------------------------------------------------------------------------------------------------------------------------------------------------------------------------------------------------------------------------------------------------------------------------------------------------------------------------------------------------------------------------------------------------------------------------------------------------------------------------------------------------------------------------------------------------------------------------------------------------------------------------------------------------------------------------------------------------------------------------------------------------------------------------------------------------------------------------------------------------------------------------------------------------------------------------------------------------------------------------------------------------------------------------------------------------------------------------------------------------------------------------------------------------------------------------------|
|               | <p>physiologist*" or "personal trainer*" or trainer* or "health educator*" or "allied health personnel" or lead* or led or supervis*) )</p> <p>S16 S14 OR S15</p> <p>S17 (MH "Community Health Centers+")</p> <p>S18 TI ( (communit* or "community based" or "community centre*" or "community center*" or "fitness centre*" or "fitness center*" or gym* or "community hall*") OR ( (communit* or "community based" or "community centre*" or "community center*" or "fitness centre*" or "fitness center*" or gym* or "community hall*")</p> <p>S19 S17 OR S18</p> <p>S20 S6 AND S13 AND S16 AND S19</p> <p>S21 (MH "Adult") OR (MH "Aged+") OR (MH "Middle Age") OR (MH "Young Adult")</p> <p>S22 TI ( (adult* or "young adult*" or "middle-aged" or elder* or "older adult*") ) OR AB ( (adult* or "young adult*" or "middle-aged" or elder* or "older adult*") )</p> <p>S23 S21 OR S22</p> <p>S24 S20 AND S23</p> <p>S25 S20 AND S23 Limiters - Publication Date: 20040101-20231231</p>                                                                                                                                                                                                                                                                                                                                                                                                                                                                                                                                                                                                                                                                                                                                                                                |
| <b>PubMed</b> | <p>(((((("Diabetes Mellitus, Type 2"[Mesh]) OR (NIDDM[Title/Abstract] OR T2DM[Title/Abstract] OR T2D[Title/Abstract])) OR ("type 2 diabetes"[Title/Abstract] OR "adult onset diabetes"[Title/Abstract] OR "slow onset diabetes"[Title/Abstract] OR "ketosis resistant diabetes" OR "non insulin dependent diabetes"[Title/Abstract])) AND (((("Exercise Therapy"[Mesh]) OR "Exercise"[Mesh]) OR "Physical Fitness"[Mesh]) OR ("physical activity"[Title/Abstract] OR exercise[Title/Abstract] OR fitness[Title/Abstract] OR "group exercise"[Title/Abstract] OR "strength training"[Title/Abstract] OR "group fitness"[Title/Abstract] OR "functional fitness"[Title/Abstract] OR "functional training"[Title/Abstract])))) AND (("Health Personnel"[Mesh]) OR (clinician*[Title/Abstract] OR physiotherap*[Title/Abstract] OR "physical therapist"[Title/Abstract] OR "exercise physiologist"[Title/Abstract] OR "personal trainer"[Title/Abstract] OR trainer*[Title/Abstract] OR "health educator"[Title/Abstract] OR "allied health personnel"[Title/Abstract] OR lead*[Title/Abstract] OR led[Title/Abstract] OR supervis*[Title/Abstract])))) AND ((("Community Health Centers"[Mesh]) OR (communit*[Title/Abstract] OR "community based"[Title/Abstract] OR "community centre"[Title/Abstract] OR "community centers"[Title/Abstract] OR "fitness centres"[Title/Abstract] OR "fitness centers"[Title/Abstract] OR gyms[Title/Abstract] OR "community halls"[Title/Abstract])))) AND ((("Adult"[Mesh]) OR (adult*[Title/Abstract] OR "young adult"[Title/Abstract] OR "young adults"[Title/Abstract] OR "middle-aged"[Title/Abstract] OR elder*[Title/Abstract] OR "older adult" OR "older adults"[Title/Abstract])))- limited 2003 – 2023 and English language.</p> |
